# Supplementary material for: Phycocyanobilin is the molecule responsible for the nephroprotective action of phycocyanin in acute kidney injury caused by mercury
Source: Royal Society of Chemistry journal article supplement (doi:10.1039/d0fo03294h), 2021-01-01
Supplement: d0fo03294h1.pdf [file d0fo03294h1.pdf]

| Parameter                                               | Control            | 5 mg/kg<br>HgCl <sub>2</sub> | 3.0 mg/kg<br>PCB   | 5 mg/kg HgCl <sub>2</sub> + PCB |                      |                     | F <sub>5,35</sub> |
|---------------------------------------------------------|--------------------|------------------------------|--------------------|---------------------------------|----------------------|---------------------|-------------------|
|                                                         |                    |                              |                    | 0.75 mg/kg                      | 1.5 mg/kg            | 3.0 mg/kg           |                   |
| Kidney relative weight (g of kidney/100 g)              | 1.129 ± 0.08885    | 2.255 ± 0.3343*              | 1.183 ± 0.04620    | 1.318 ± 0.1178                  | 1.080 ± 0.1151       | 1.362 ± 0.0799      | 7.238             |
| Blood urea nitrogen (BUN, mg/dL)                        | 55.85 ± 4.657      | 91.45 ± 6.784*               | 57.55 ± 4.526      | 52.67 ± 6.274                   | 54.07 ± 3.355        | 51.45 ± 6.468       | 7.711             |
| Creatinine (mg/dL)                                      | 0.1333 ± 0.04714   | 0.9037 ± 0.2076*             | 0.2000 ± 0.03443   | 0.2000 ± 0.08165                | 0.08333 ± 0.01667    | 0.08889 ± 0.0222    | 10.832            |
| O.D nephrin/O.D β-actine (ratio normalized)             | 0.9325 ± 0.007077  | 0.8403 ± 0.01641*            | 0.9830 ± 0.009891  | 0.8270 ± 0.009755*              | 0.9488 ± 0.01617*    | 0.9398 ± 0.02237*** | 38.025            |
| O.D podocin/O.D β-actine (ratio normalized)             | 0.9293 ± 0.03854   | 0.7698 ± 0.009295*           | 0.9795 ± 0.01762   | 0.8018 ± 0.01038***             | 0.8793 ± 0.009860*** | 0.8620 ± 0.02601*** | 36.285            |
| Lipid peroxidation (URF/mg protein)                     | 0.2634 ± 0.01890   | 0.9858 ± 0.1889*             | 0.3180 ± 0.06578   | 0.3712 ± 0.05924                | 0.3396 ± 0.04903     | 0.4783 ± 0.04478    | 9.019             |
| ROS quantification (ng of DCF formed/mg protein/h)      | 179.6 ± 17.92      | 472.7 ± 63.14*               | 275.3 ± 19.45      | 152.6 ± 15.13                   | 213.7 ± 54.99        | 114.7 ± 7.652       | 16.977            |
| Nitrite quantification (ug NO <sub>2</sub> /mg protein) | 4.122 ± 0.3542     | 6.937 ± 0.2829*              | 4.238 ± 0.4835     | 4.805 ± 0.3580                  | 4.964 ± 0.4897       | 5.455 ± 0.3791      | 7.593             |
| GSH content (μg of GSH/ mg protein)                     | 5.935 ± 0.6363     | 5.314 ± 0.5596               | 3.646 ± 0.2540*    | 3.224 ± 0.3874*                 | 3.402 ± 0.3200*      | 4.060 ± 0.5697*     | 3.799             |
| GSSG content (μg of GSSG/ mg protein)                   | 0.1262 ± 0.008748  | 0.3405 ± 0.7813*             | 0.08383 ± 0.01033  | 0.08740 ± 0.007487              | 0.09720 ± 0.004306   | 0.1339 ± 0.01430    | 11.056            |
| GSH <sup>2</sup> /GSSG ratio                            | 345.0 ± 64.95      | 79.69 ± 16.77*               | 240.9 ± 47.74      | 134.6 ± 37.12*                  | 135.2 ± 20.23*       | 228.8 ± 41.15       | 11.056            |
| Catalasa activity (k/ μg protein)                       | 0.03746 ± 0.005281 | 0.01681 ± 0.001553*          | 0.03023 ± 0.007812 | 0.03414 ± 0.003639              | 0.02848 ± 0.002818   | 0.03408 ± 0.004193  | 3.620             |
| GPX activit (μgGSH consumed/ mg protein/min)            | 322.2 ± 61.19      | 99.60 ± 4.732*               | 285.1 ± 42.42      | 296.1 ± 47.36                   | 293.7 ± 16.48        | 299.5 ± 54.12       | 3.523             |
| GR activity (nmols of NADPH consumed/mg protein/min)    | 0.4405 ± 0.06994   | 0.2050 ± 0.003821*           | 0.4666 ± 0.1101    | 0.2838 ± 0.02500                | 0.2838 ± 0.01883     | 0.4171 ± 0.03711    | 3.581             |
| Caspase-3 activity (pmols of pNA formed/mg protein/h)   | 75.62 ± 19.35      | 313.6 ± 60.79*               | 94.45 ± 21.73      | 233.0 ± 39.46*                  | 220.4 ± 46.28*       | 127.5 ± 29.48       | 4.870             |
| Caspase-9 activity (pmols of pNA formed/mg protein/h)   | 161.3 ± 25.98      | 303.1 ± 48.89*               | 55.76 ± 16.79      | 89.50 ± 16.77                   | 217.3 ± 36.78        | 83.78 ± 34.24       | 5.824             |

Supplementary data S1. The data represent the mean ± SE. One-way ANOVA and Student-Newman-Keuls post hoc.

\*  $P < 0.05$  Vs control

\*\*  $P < 0.05$  Vs HgCl<sub>2</sub>
