# Supplementary material for: Phycocyanobilin is the molecule responsible for the nephroprotective action of phycocyanin in acute kidney injury caused by mercury
Source: Royal Society of Chemistry journal article supplement (doi:10.1039/d0fo03294h), 2021-01-01
Supplement: d0fo03294h2.pdf [file d0fo03294h2.pdf]

| Kidney damage score | Control | 5 mg/kg HgCl <sub>2</sub> | 3.0 mg/kg PCB | 5 mg/kg HgCl <sub>2</sub> + PCB |           |           | H      |
|---------------------|---------|---------------------------|---------------|---------------------------------|-----------|-----------|--------|
|                     |         |                           |               | 0.75 mg/kg                      | 1.5 mg/kg | 3.0 mg/kg |        |
| 10% percentil       | 0.000   | 3.000                     | 0.000         | 3.000                           | 0.000     | 0.000     |        |
| 25% percentil       | 0.000   | 3.000                     | 0.000         | 3.500                           | 0.2500    | 0.2500    |        |
| 50% percentil       | 0.000   | 4.000*                    | 0.000         | 4.000*                          | 1.000     | 1.000     | 24.760 |
| 75% percentil       | 0.000   | 4.000                     | 0.000         | 4.000                           | 1.750     | 1.750     |        |
| 90% percentil       | 0.000   | 4.000                     | 0.000         | 4.000                           | 2.000     | 2.000     |        |

Supplementary data S2. The data represents the median ± interquartile space. Kruskal Wallis and Dunn *post hoc*.

(\* )  $P < 0.05$  vs control
